# Supplementary material for: AutoCancer as an automated multimodal framework for early cancer detection
Source: PubMed Central journal article supplement — iScience. 2024 Jun 5;27(7):110183. doi: 10.1016/j.isci.2024.110183 (PMC11233972; doi:10.1016/j.isci.2024.110183), 2024-06-05
Supplement: mmc1.pdf [file mmc1.pdf]

**iScience, Volume 27**

**Supplemental information**

**AutoCancer as an automated multimodal  
framework for early cancer detection**

**Linjing Liu, Ying Xiong, Zetian Zheng, Lei Huang, Jiangning Song, Qiuzhen Lin, Buzhou Tang, and Ka-Chun Wong**

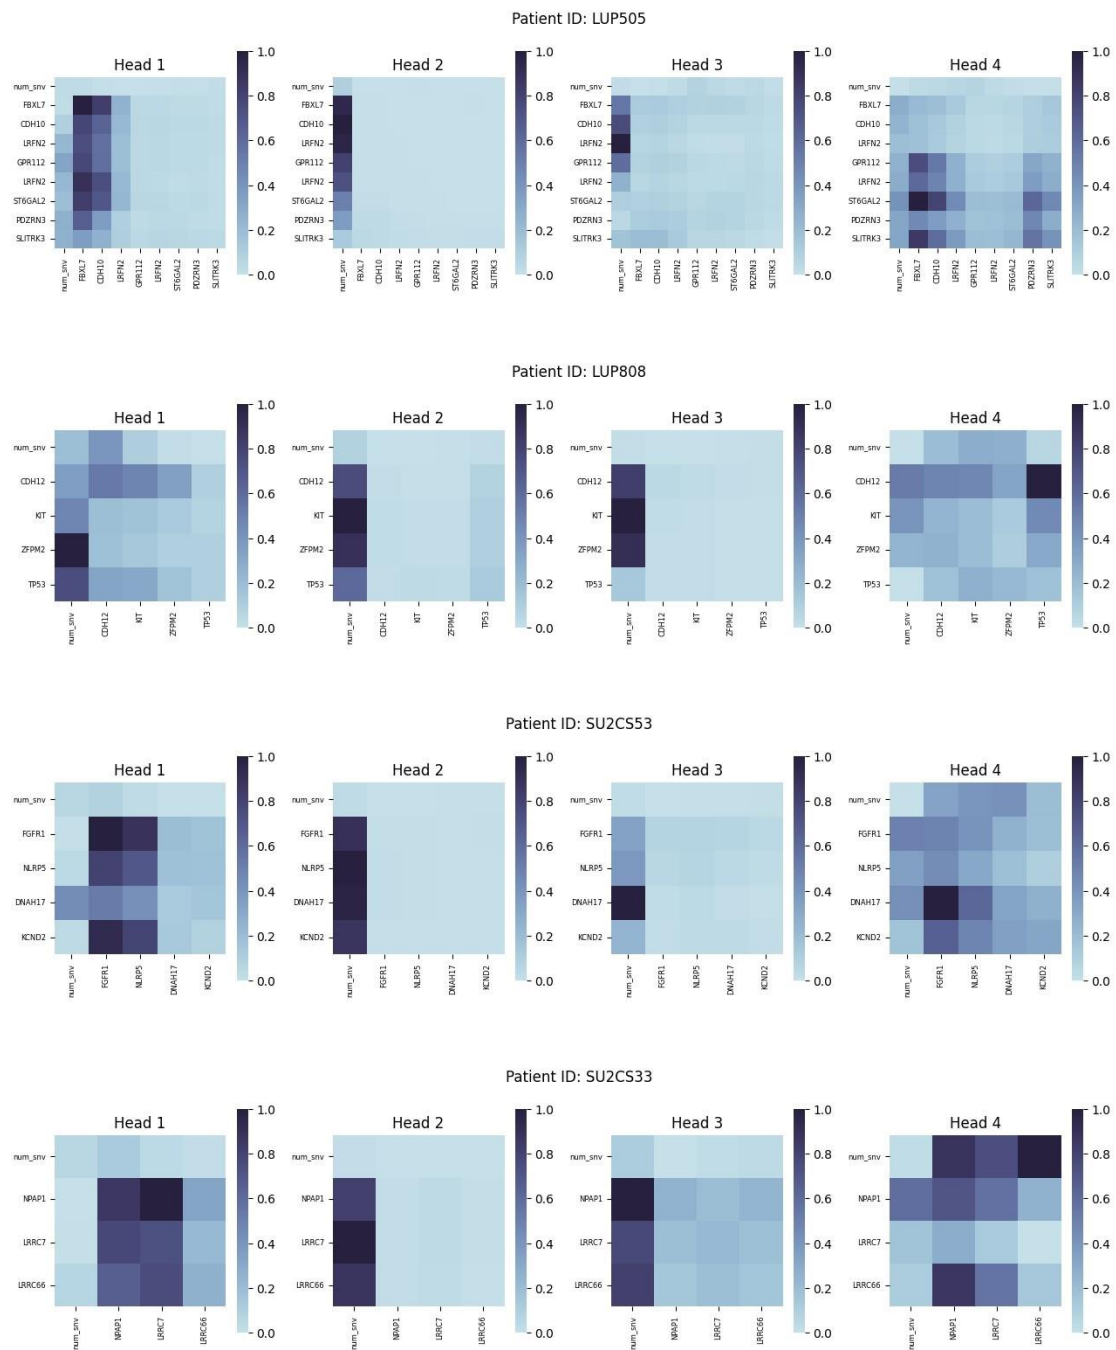

**Figure S1. Visualization of attention matrix in each head, related to Figure 5.**

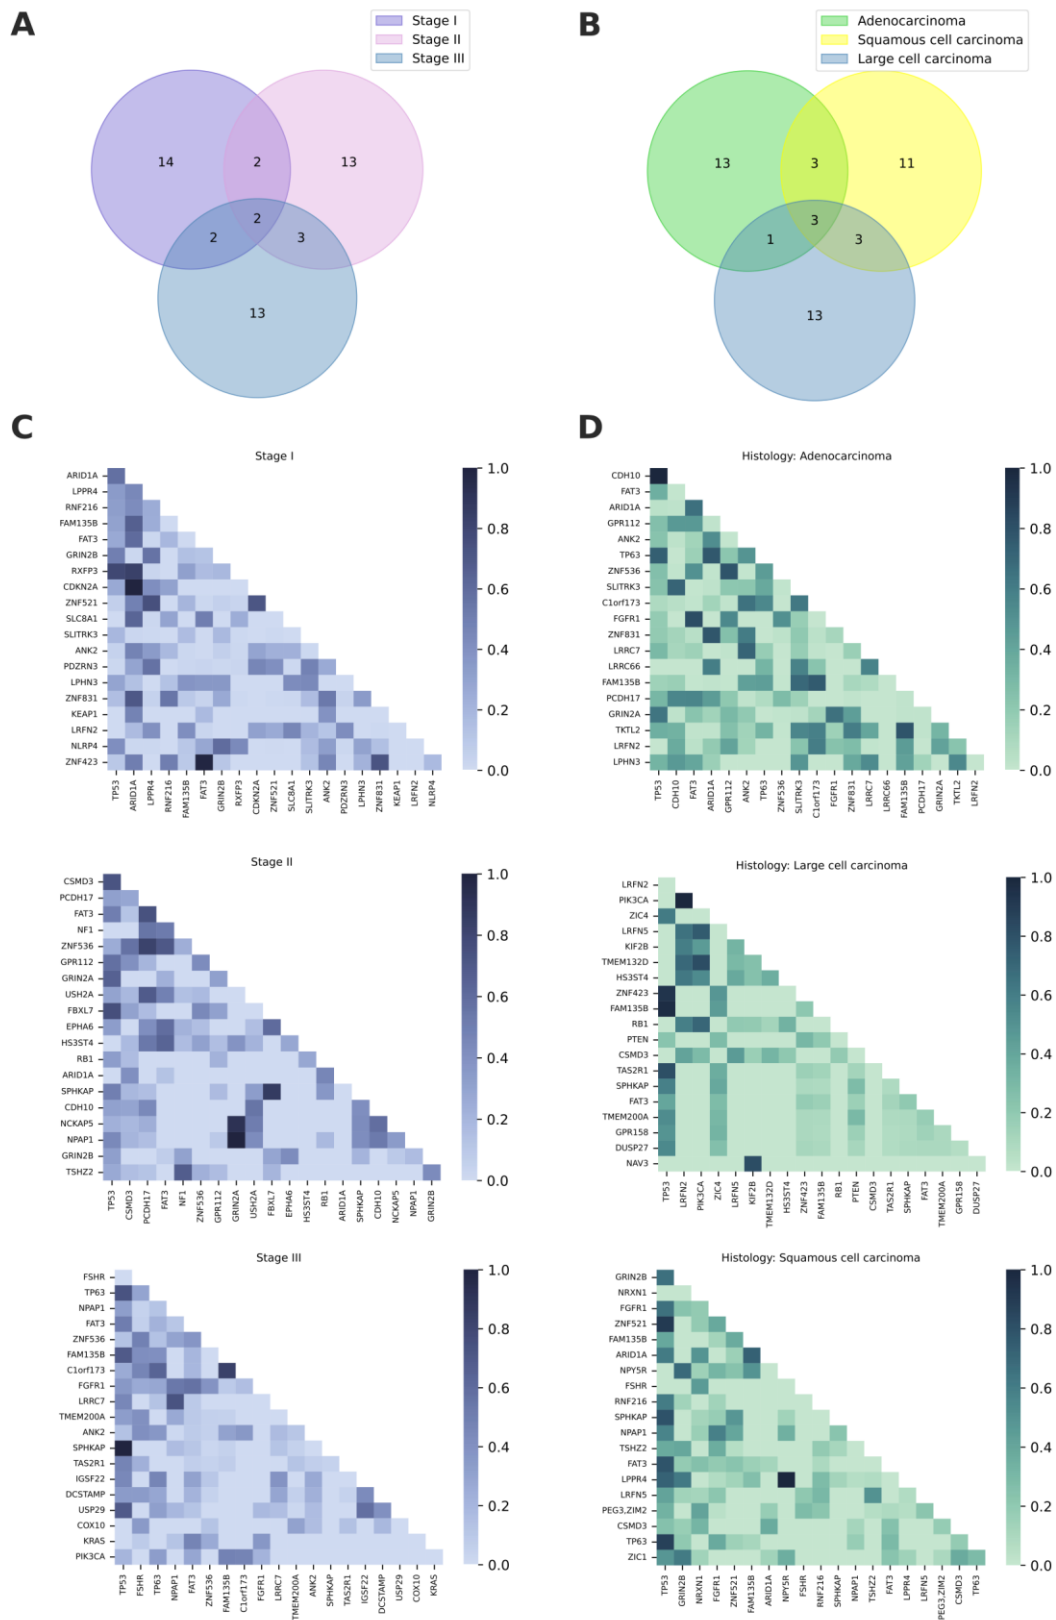

**Figure S2. Top 20 focused genes vary across different stages and histology subtypes, related to Figure 5.** (A) Overlap of top focused gene in different stages. (B) Overlap of top focused gene in different histology subtypes. (C) Attention matrix across top focused genes in different stages. (D) Attention matrix across top focused genes in different histology subtypes.

**Table S2.** Top genes unique to each stage, related to Figure 5.

| <b>Stage I</b> | <b>Stage II</b> | <b>Stage III</b> |
|----------------|-----------------|------------------|
| LPPR4          | CSMD3           | FSHR             |
| RNF216         | PCDH17          | TP63             |
| RXFP3          | NF1             | C1orf173         |
| CDKN2A         | GPR112          | FGFR1            |
| ZNF521         | GRIN2A          | LRRC7            |
| SLC8A1         | USH2A           | TMEM200A         |
| SLITRK3        | FBXL7           | TAS2R1           |
| PDZRN3         | EPHA6           | IGSF22           |
| LPHN3          | HS3ST4          | DCSTAMP          |
| ZNF831         | RB1             | USP29            |
| KEAP1          | CDH10           | COX10            |
| LRFN2          | NCKAP5          | KRAS             |
| NLRP4          | TSHZ2           | PIK3CA           |
| ZNF423         |                 |                  |

**Table S3.** Top genes unique to each subtype, related to Figure 5.

| <b>Adenocarcinoma</b> | <b>Large cell carcinoma</b> | <b>Squamous cell carcinoma</b> |
|-----------------------|-----------------------------|--------------------------------|
| PCDH17                | GRIN2B                      | DUSP27                         |
| ZNF831                | TSHZ2                       | GPR158                         |
| GRIN2A                | PEG3                        | NAV3                           |
| LRRC66                | ZIM2                        | RB1                            |
| ZNF536                | RNF216                      | TAS2R1                         |
| SLITRK3               | LPPR4                       | TMEM132D                       |
| CDH10                 | NPY5R                       | TMEM200A                       |
| C1orf173              | NPAP1                       | KIF2B                          |
| TKTL2                 | NRXN1                       | ZNF423                         |
| LRRC7                 | ZIC1                        | PTEN                           |
| LPHN3                 | FSHR                        | ZIC4                           |
| GPR112                | ZNF521                      | PIK3CA                         |
| ANK2                  |                             | HS3ST4                         |

**Table S4. Top 50 gene pairs associated with non-small cell lung cancer, related to Figure 6.**

| <b>Gene1</b> | <b>Gene2</b> | <b>Weight</b> |
|--------------|--------------|---------------|
| TP53         | SPHKAP       | 5.002291      |
| TP63         | TP53         | 4.281027      |
| NF1          | ITGB3        | 3.460196      |
| TP53         | FAM135B      | 3.3944192     |
| PCDH17       | FAT3         | 3.322363      |
| ST6GAL2      | FBXL7        | 3.2492893     |
| TP53         | DUSP27       | 3.2138388     |
| ZNF536       | FAT3         | 3.0865207     |
| PPP1R3A      | LRRC66       | 3.000533      |
| CDKN2A       | ARID1A       | 2.9695902     |
| SLC8A1       | C1orf173     | 2.8343005     |
| NPAP1        | FGFR1        | 2.765613      |
| TP53         | CDH10        | 2.6875825     |
| ZNF423       | TP53         | 2.6446936     |
| RXFP3        | PTCHD4       | 2.6365385     |
| NPY5R        | LPPR4        | 2.6264887     |
| SLITRK4      | FAT3         | 2.600594      |
| ZNF521       | LPPR4        | 2.5760121     |
| ZNF521       | TP53         | 2.56786       |
| NF1          | GPR112       | 2.5040803     |
| RNF216       | ARID1A       | 2.5034041     |
| ZNF536       | DUSP27       | 2.4904222     |
| SLITRK4      | KRAS         | 2.432415      |
| NPAP1        | GRIN2A       | 2.4271429     |
| TP53         | TAS2R1       | 2.3864439     |
| RNF216       | KCNJ12       | 2.3534539     |
| TP53         | LPPR4        | 2.3361993     |
| LPPR4        | HTR5A        | 2.315725      |
| NCKAP5       | GRIN2A       | 2.296194      |
| LRRC4C       | DARC         | 2.290184      |
| TP53         | HTR5A        | 2.2640498     |
| TP53         | NPAP1        | 2.2537193     |
| RNF216       | LRRC66       | 2.2354383     |
| SLC8A1       | NF1          | 2.2003665     |
| RIMS2        | LRRC7        | 2.1979532     |
| KLHL6        | CUL3         | 2.1748445     |
| RB1          | GRM8         | 2.172481      |

|            |         |           |
|------------|---------|-----------|
| TP53       | GPR158  | 2.1604207 |
| RP1        | KIT     | 2.1481342 |
| ZNF521     | CDKN2A  | 2.1349797 |
| TKTL2      | FAM135B | 2.1266603 |
| TBX22      | LPPR4   | 2.1199358 |
| PEG3, ZIM2 | LRRC7   | 2.114758  |
| SPHKAP     | FBXL7   | 2.106174  |
| TP53       | CDH12   | 2.0939147 |
| TMEM200A   | TLR4    | 2.0883563 |
| ZNF423     | PTCHD4  | 2.0759187 |
| USP29      | IGSF22  | 2.072718  |
| TP63       | ARID1A  | 2.064836  |
| ZNF831     | ANK2    | 2.0594206 |

**Table S5. Top 20 gene pairs across different stages, related to Figure 6.**

| <b>Stage I</b> |              |               |
|----------------|--------------|---------------|
| <b>Gene1</b>   | <b>Gene2</b> | <b>Weight</b> |
| NLRP5          | FGFR1        | 3.2188225     |
| PPP1R3A        | LRRC66       | 3.000533      |
| ZNF423         | FAT3         | 2.93407       |
| NF1            | GRIN2B       | 2.6792438     |
| RXFP3          | PTCHD4       | 2.6365385     |
| NLRP8          | GLCC11       | 2.561884      |
| PTEN           | HTR5A        | 2.4076223     |
| RNF216         | KCNJ12       | 2.3534539     |
| LRRC4C         | DARC         | 2.290184      |
| ZNF521         | LPPR4        | 2.2273345     |
| ZNF831         | ZNF423       | 2.1767464     |
| RB1            | GRM8         | 2.172481      |
| RP1            | KIT          | 2.1481342     |
| TBX22          | LPPR4        | 2.1199358     |
| ZNF80          | USP29        | 2.0968084     |
| ZNF423         | PTCHD4       | 2.0759187     |
| CHAT,SLC18A3   | CDH7         | 2.067424      |
| THSD7B         | GLCC11       | 2.057376      |
| ZNF423         | EPHA10       | 2.0379512     |
| NLRP5          | KLHL6        | 2.0228753     |

| <b>Stage II</b> |              |               |
|-----------------|--------------|---------------|
| <b>Gene1</b>    | <b>Gene2</b> | <b>Weight</b> |
| NF1             | ITGB3        | 3.460196      |
| RIMS2           | FAM71B       | 2.3495607     |
| ST6GALNAC5      | PIK3CG       | 2.2404597     |
| RIMS2           | LRRC7        | 2.1979532     |
| SPHKAP          | FBXL7        | 2.106174      |
| TMEM200A        | TLR4         | 2.0588264     |
| ZNF536          | PCDH17       | 2.0050983     |
| TSHZ2           | SLC8A1       | 1.9921732     |
| KLHL6           | ANK2         | 1.9284734     |
| PCDH17          | AKT1         | 1.9082471     |
| EPHA10          | ASTN1        | 1.8331211     |
| TP63            | RB1          | 1.7755973     |
| GRIN2A          | FGFR1        | 1.7673779     |
| ZNF521          | RB1          | 1.734963      |
| SLC8A1          | KEAP1        | 1.7137923     |
| ST6GAL2         | RIT1         | 1.6830616     |
| TMEM132D        | PIK3CA       | 1.6815755     |
| GRIN2A          | CXCL16       | 1.6730747     |
| TSHZ2           | NF1          | 1.656126      |
| ZNF831          | ZIM3         | 1.6461878     |



| Stage III |              |           |
|-----------|--------------|-----------|
| Gene1     | Gene2        | Weight    |
| TP53      | SPHKAP       | 3.5790436 |
| TAS2R1    | NLRP12       | 2.9556944 |
| TP63      | TP53         | 2.6376    |
| TP53      | FAM135B      | 2.4896145 |
| NF1       | GPR112       | 2.4237237 |
| PPP1R3A   | NLRP8        | 2.167505  |
| NPAP1     | LRRRC66      | 2.1150541 |
| TP53      | GPR158       | 2.0772412 |
| FGFR1     | FAT3         | 2.0228293 |
| ZNF423    | TP53         | 1.913132  |
| ZFPM2     | TP53         | 1.8626779 |
| GPR139    | CHAT,SLC18A3 | 1.7379782 |
| PIK3CA    | FAM135B      | 1.7266072 |
| SLITRK3   | C1orf173     | 1.6878777 |
| PIK3CA    | C1orf173     | 1.6648972 |
| TP63      | IGSF22       | 1.6589303 |
| PIK3CA    | MMP16        | 1.647397  |
| TP53      | IGSF22       | 1.5960064 |
| TP53      | MMP16        | 1.5473424 |
| LRRRC7    | LRRRC66      | 1.5400691 |

**Table S6. Top 20 gene pairs across different subtypes, related to Figure 6.**

| <b>Adenocarcinoma</b> |              |               |
|-----------------------|--------------|---------------|
| <b>Gene1</b>          | <b>Gene2</b> | <b>Weight</b> |
| TP53                  | NCKAP5       | 4.594971      |
| NLRP5                 | FGFR1        | 3.2188225     |
| PPP1R3A               | LRRC66       | 3.000533      |
| ZNF423                | FAT3         | 2.93407       |
| TP53                  | CDH10        | 2.6875825     |
| RXFP3                 | MAGEL2       | 2.6447456     |
| RXFP3                 | PTCHD4       | 2.6365385     |
| NLRP8                 | GLCCI1       | 2.561884      |
| RNF216                | ARID1A       | 2.5034041     |
| NPAP1                 | GRIN2A       | 2.4271429     |
| ZNF536                | DUSP27       | 2.361931      |
| KEAP1                 | KCNA4        | 2.33498       |
| RB1                   | ARID1A       | 2.2926912     |
| PDGFRA                | ERBB4        | 2.2722187     |
| RNF216                | LRRC66       | 2.2354383     |
| RIMS2                 | LRRC7        | 2.1979532     |
| ZNF831                | ZNF423       | 2.1767464     |
| RB1                   | GRM8         | 2.172481      |
| SLITRK3               | PPP1R3A      | 2.1534142     |
| TKTL2                 | FAM135B      | 2.1266603     |

| <b>Large cell carcinoma</b> |              |               |
|-----------------------------|--------------|---------------|
| <b>Gene1</b>                | <b>Gene2</b> | <b>Weight</b> |
| PIK3CA                      | LRFN2        | 2.0425072     |
| ZNF423                      | TP53         | 1.913132      |
| NAV3                        | KIF2B        | 1.6688011     |
| PIK3CA                      | LRFN5        | 1.5455643     |
| TMEM132D                    | LRFN2        | 1.4265536     |
| LRFN2                       | HS3ST4       | 1.2747283     |
| LRFN2                       | KIF2B        | 1.2248298     |
| TP53                        | SPHKAP       | 1.1959748     |
| PIK3CA                      | HS3ST4       | 1.0939729     |
| TP53                        | GPR158       | 1.0075513     |
| ZNF423                      | ZIC4         | 0.9846345     |
| LRFN5                       | CSMD3        | 0.9403834     |
| PIK3CA                      | KIF2B        | 0.9347547     |
| LRFN2                       | CSMD3        | 0.8521757     |
| PIK3CA                      | TMEM132D     | 0.8232899     |
| TAS2R1                      | TP53         | 0.8149611     |
| LRFN5                       | HS3ST4       | 0.7868407     |
| ZIC4                        | TAS2R1       | 0.7427185     |
| PIK3CA                      | RB1          | 0.7098927     |
| RB1                         | HS3ST4       | 0.6881671     |

| <b>Squamous cell carcinoma</b> |              |               |
|--------------------------------|--------------|---------------|
| <b>Gene1</b>                   | <b>Gene2</b> | <b>Weight</b> |
| TP53                           | SLITRK4      | 3.3913813     |
| RXFP3                          | ARID1A       | 2.4295762     |
| RIMS2                          | FAM71B       | 2.3495607     |
| TP53                           | RXFP3        | 2.2045038     |
| RP1                            | KIT          | 2.1481342     |
| TP53                           | SPHKAP       | 2.0849867     |
| LRRC66                         | BRAT1        | 2.068101      |
| FAM135B                        | ALK          | 2.064527      |
| CDKN2A                         | ARID1A       | 1.9739954     |
| GRIN2B                         | CTNND2       | 1.9530003     |
| NPY5R                          | CUL3         | 1.9203162     |
| RIT1                           | EPHA6        | 1.9117112     |
| NPY5R                          | GRIN2B       | 1.8170743     |
| TP53                           | GRIN2B       | 1.7383668     |
| PIK3CA                         | FAM135B      | 1.7266072     |
| ST6GAL2                        | RIT1         | 1.6830616     |
| TSHZ2                          | NF1          | 1.656126      |
| LPPR4                          | GRIN2B       | 1.6214553     |
| TP53                           | ARID1A       | 1.6032948     |
| TP53                           | RNF216       | 1.5940902     |
